# Supplementary material for: Resistance to neoadjuvant chemotherapy in breast cancers: a metabolic perspective
Source: Springer Nature journal article supplement (doi:10.1186/s13046-025-03500-w), 2025-08-11
Supplement: MOESM2 [file 13046_2025_3500_MOESM2_ESM.pdf]

## Confirmation of Publication and Licensing Rights

May 21st, 2025

**Subscription Type:** Institution - Academic  
**Agreement number:** NV28AKMJIS  
**Publisher Name:** Springer Nature

**Citation to Use:** Created in BioRender. Corbet, C. (2025) <https://BioRender.com/2ymdswv>

To whom this may concern,

This document is to confirm that Cyril Corbet has been granted a license to use the BioRender Content, including icons, templates, and other original artwork, appearing in the attached Completed Graphic pursuant to BioRender’s [Academic License Terms](#). This license permits BioRender Content to be sublicensed for use in publications (journals, textbooks, websites, etc.).

All rights and ownership of BioRender Content are reserved by BioRender. All Completed Graphics must be accompanied by the following citation: “Created in BioRender. Corbet, C. (2025) <https://BioRender.com/2ymdswv>”.

BioRender Content included in the Completed Graphic is not licensed for any commercial uses beyond use in a publication. For any commercial use of this figure, users may, if allowed, recreate it in BioRender under an Industry BioRender Plan.

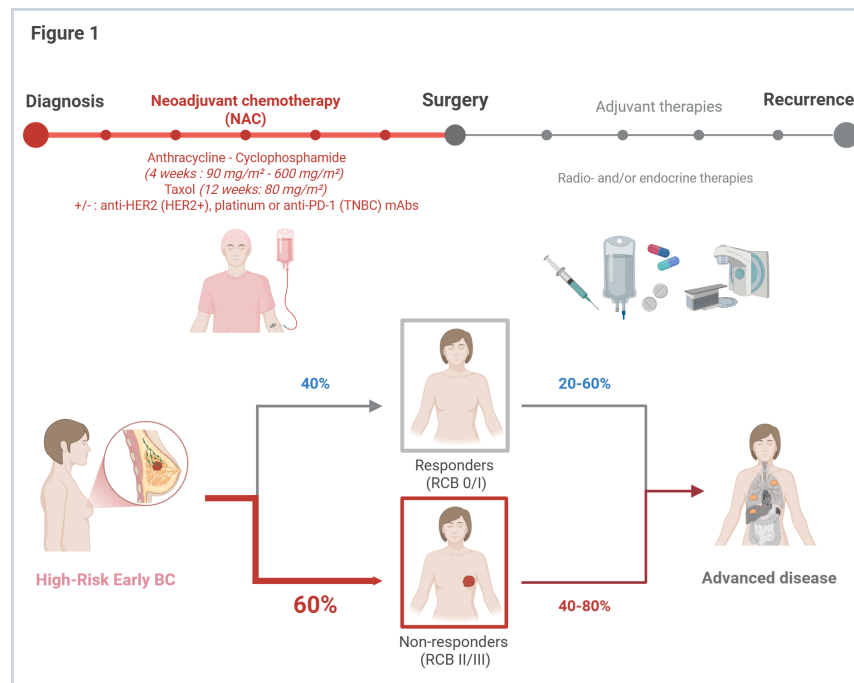

For any questions regarding this document, or other questions about publishing with BioRender, please refer to our [BioRender Publication Guide](#), or contact BioRender Support at [support@biorender.com](mailto:support@biorender.com).
